# Supplementary material
Source: MDPI journal article supplement (https://www.mdpi.com/2311-5637/8/8/367)
Supplement: s1 [file s1 › fermentation-1834644-supplementary.pdf]

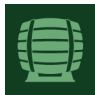

## Supplemental File

*L. casei* and *L. kefir* identification.

B2 identification

BLAST identification resulted in three possible species present in Table S1.

**Table S1.** B2—16S RNA sequence and BLAST identification results.

|           |                                                                                                                                                                                                                                                                                                                                                                                                                                                                                                                                                                                                                                                                                                                                                       |                |                                     |     |
|-----------|-------------------------------------------------------------------------------------------------------------------------------------------------------------------------------------------------------------------------------------------------------------------------------------------------------------------------------------------------------------------------------------------------------------------------------------------------------------------------------------------------------------------------------------------------------------------------------------------------------------------------------------------------------------------------------------------------------------------------------------------------------|----------------|-------------------------------------|-----|
| 2-antigen | agtggcgaactggtagtaacacgtgggtaacct<br>gcccttgaagtaggggataacacttgaaacaggt<br>gctaataccgtataacaacaaaaccacatggttt<br>ggtttaaagatggctcggctatcactttaggatg<br>gacccgcggcgattagctgttgtaaggtaatg<br>gcctaccaaggcaatgatacgtagccgacctgag<br>agggtaatcgccacattgggactgagacacggc<br>ccaaactcctacgggaggcagcagtagggaatct<br>tcacaatggacgaaagtctgatggagcaacgcc<br>gcgtgagtgatgaagggttcggctcgtaaaactct<br>gttgggagaagaacaggtgtcagagtaactgtt<br>gacatcttgacggtatccaaccagaaagccacgg<br>ctaactacgtccagcagccggttaatacgtag<br>gtggcaagcgtgtccgattattggcgtaaag<br>cgagcgcaggcggttcttaggtctgatgtgaaag<br>ccttcggcttaaccggagaagtgcacggaacca<br>ggagacttgagtgcagaagaggacagtggaactc<br>catgtgtagcgggtgaaatgcgtagatatatggaag<br>aacaccagtggcgaaggcggtgtctggtctgta<br>actgacgclgagg | MH549130.<br>1 | <i>Lactobacillus<br/>kefiri</i>     | 100 |
|           |                                                                                                                                                                                                                                                                                                                                                                                                                                                                                                                                                                                                                                                                                                                                                       | KT887245.<br>1 | <i>Lactobacillus<br/>sunkii</i>     | 100 |
|           |                                                                                                                                                                                                                                                                                                                                                                                                                                                                                                                                                                                                                                                                                                                                                       | KP763889.<br>1 | <i>Lactobacillus<br/>helveticus</i> | 100 |

However, phylogenetic analysis has placed B2 in the same branch as *Lactobacillus kefir* (Figure S1).

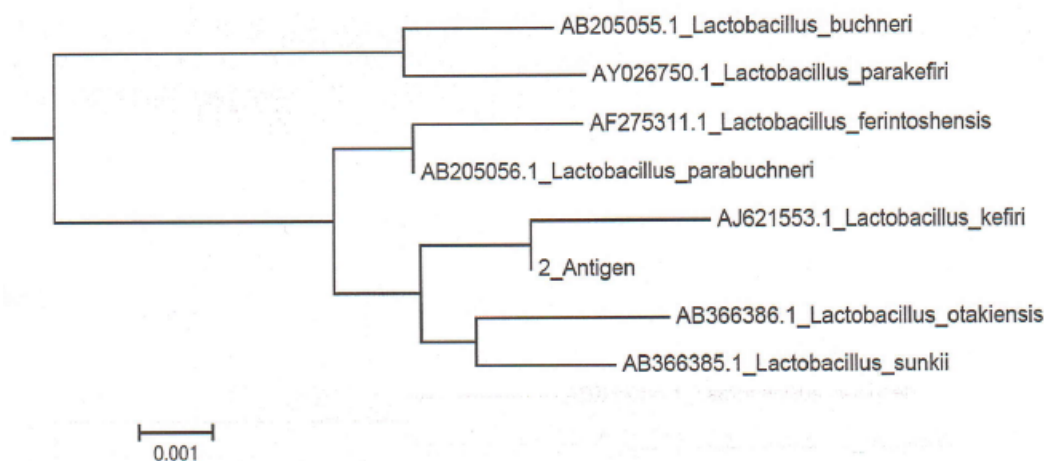

**Figure S1.** B2 (2\_antigen) location on phylogenetic tree.

B7 Identification

BLAST identification resulted in three possible species present in Table S2

**Table S2.** B7—16S RNA sequence and BLAST identification results.

|           |                                                                                                                                                                                                                                                                                                                                                                                                                                                                                                                                                                                                                                                                                                                                                                      |            |                                |     |
|-----------|----------------------------------------------------------------------------------------------------------------------------------------------------------------------------------------------------------------------------------------------------------------------------------------------------------------------------------------------------------------------------------------------------------------------------------------------------------------------------------------------------------------------------------------------------------------------------------------------------------------------------------------------------------------------------------------------------------------------------------------------------------------------|------------|--------------------------------|-----|
| 7-antigen | tgcttgaccgagattcaacatggaacgagtggcg<br>gacgggtgagtaacacgtgggtaacctgccctaa<br>gtgggggataacatttgaaacagatgctaatacc<br>gcatagatccaagaaccgcatggtcttggctgaa<br>agatggcgtaagctatcgcttttgatggaccgc<br>ggcgtattagctagttggtgagtaacggctcacc<br>aaggcgatgatacgtagccgaactgagaggtga<br>tcggccacattgggactgagacacggccaaact<br>cctacggggaggcagcagtagggaaatctccaaa<br>tggacgcaagtctgatggagcaacgcgcgtgag<br>tgaagaaggcttctgggtcgtaaaactctgtgtg<br>gagaagaatggtcggcagagtaactgtgtcggc<br>gtgacggtatccaaccagaaagccacggctaact<br>acgtgccagcagccggtatacgtaggtggca<br>agcgttatccggattatttggcgtaaacgagcg<br>caggcggtttttaagtctgatgtgaaagccctcg<br>cttaaccgaggaagcgcatcggaactgggaaac<br>ttgagtgcagaagaggacagtggaaacctgtgt<br>agcggtgaaatgcgtagatatatggaagaacacc<br>agtggcgaaaggcggtgtctgtgtgtaac | CP029686.1 | <i>Lactobacillus paracasei</i> | 100 |
|           |                                                                                                                                                                                                                                                                                                                                                                                                                                                                                                                                                                                                                                                                                                                                                                      | JN188389.1 | <i>Lactobacillus casei</i>     | 100 |
|           |                                                                                                                                                                                                                                                                                                                                                                                                                                                                                                                                                                                                                                                                                                                                                                      | MH100902.1 | <i>Lactobacillus fermentum</i> | 99  |

Phylogenetic analysis has placed B7 in the same branch as *Lactobacillus casei/paracasei* (Figure S2). The limited discriminatory ability of the 16S RNA gene does not allow for the differentiation of these species.

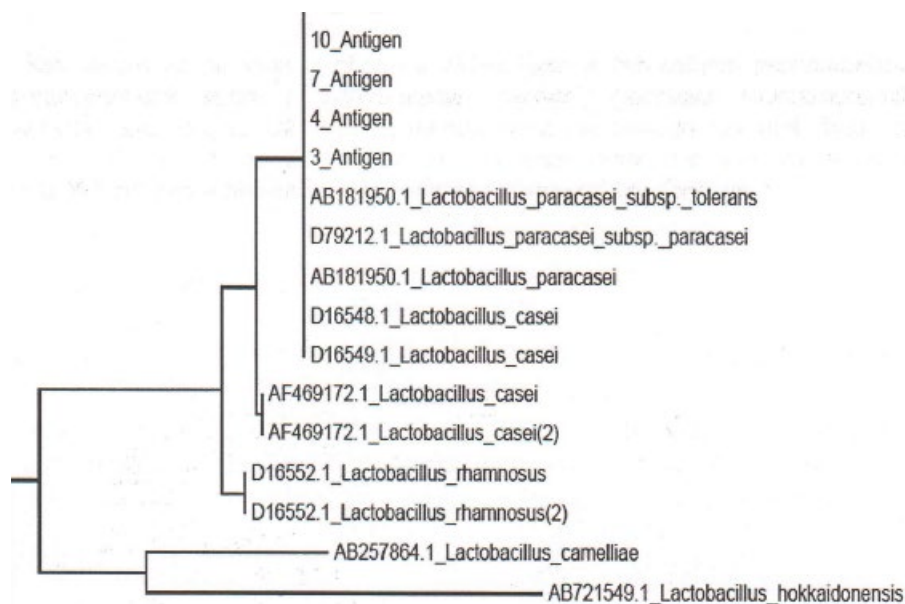

Figure S2. B7 (7\_antigen) location on phylogenetic tree.
